# Supplementary material
Source: HighWire-hosted journal article supplement (http://www.jneurosci.org/highwire/filestream/599029/field_highwire_adjunct_files/0/Figure_3.pdf)
Supplement: Figure_3.pdf [file Figure_3.pdf]

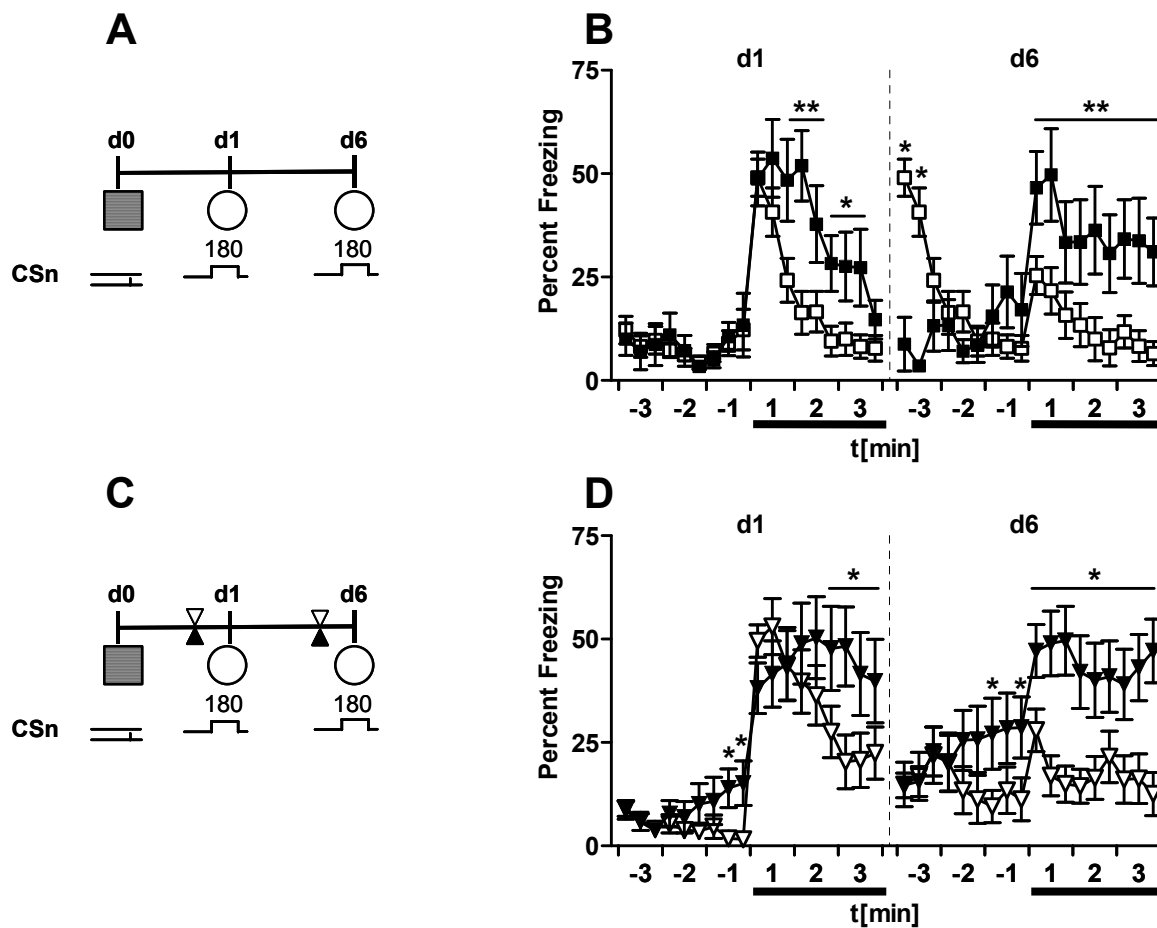

**Supplementary Figure 3: Differential involvement of CB1 in regulation of pre-tone and tone freezing following sensitization procedures.**

**(A)** Experimental procedure: Mice with genetic ablation of CB1 ( $CB1^{-/-}$ , ■,  $n = 10$ ;  $CB1^{+/+}$ , □,  $n = 15$ ; cf. Fig. 3A) and **(C)** inbred C57BL/6N mice with acute pharmacological blockade of CB1 (3mg/kg SR141716A, SR; ▼,  $n = 17$ ; vehicle, V; ▽,  $n = 17$ ; cf. Fig. 3D) before tone presentation were exposed to a 180-s tone one and six days after sensitization. **(B)** Genetic inactivation of CB1 failed to affect pre-tone freezing to the test context (day 1; *Genotype x Interval*:  $F_{8,184} = 0.26$ ,  $P = 0.978$ ), but caused a sustained freezing response to the subsequently presented tone (black bar indicates duration of tone presentation). Because of yet unknown reasons,  $CB1^{+/+}$  showed a more pronounced pre-tone freezing before the second tone presentation than  $CB1^{-/-}$  (day 6; *Genotype x Interval*:  $F_{8,176} = 3.57$ ,  $P < 0.001$ ). **(D)** Mice with pharmacological blockade of CB1 showed a slight increase in freezing towards the onset of tone presentation both at day 1 (*Drug x Interval*:  $F_{8,256} = 2.67$ ,  $P = 0.007$ ) and at day 6 (*Drug x Interval*:  $F_{8,256} = 2.71$ ,  $P = 0.007$ ). Tone presentation (black bar indicates duration of tone presentation) caused a sharp increase in freezing in both antagonist and vehicle treated mice. 2-way ANCOVAs [(*Drug, Interval*) for repeated measures (*Interval*)] with the covariate *Freezing before tone* still revealed a significant *Drug x Interval* interaction at day 1 ( $F_{8,256} = 5.5$ ,  $P < 0.0001$ ) as well as a significant effect of *Drug* at day 6 ( $F_{1,31} = 5.8$ ,  $P = 0.021$ ), even if the last 20-s before tone presentation were considered as covariate, indicating that pharmacological blockade of CB1 caused a sustained freezing response to the tone independently of potential influences on pre-tone behavior. Data were normalized to 20-s observation intervals. \*  $P < 0.05$ , \*\*  $P < 0.01$  vs. other genotype. Together these data indicate that genetic ablation and pharmacological blockade of CB1 have inconsistent effects on pre-tone freezing but consistently cause a sustained freezing response to the tone. Apparently, CB1 differentially affects pre-tone and tone freezing with the consequence that context generalization unlikely accounts for the sustained freezing response to the tone.
